# Supplementary material for: Effect of Gestational Age at Fetoscopic Laser Photocoagulation on Perinatal Outcomes for Patients with Twin–Twin Transfusion Syndrome
Source: MDPI journal article supplement (doi:10.3390/jcm12051900), 2023-02-28
Supplement: s1 [file s1]

Table S1: TTTS received FLP after 2015 March with and without Solomon technique

|                             | With Solomon<br>(N=12) | Only SLPCV<br>(N=87) | p     |
|-----------------------------|------------------------|----------------------|-------|
| At least fetal survival (N) | 11                     | 74                   | 1.0   |
| Two survival (N)            | 7                      | 54                   | 1.0   |
| Maternal age at FLP (year)  | 31.4                   | 32.4                 | 0.51  |
| PROMs after FLP (N))        | 1                      | 9                    | 1.0   |
| GA at FLP (weeks)           | 19.5                   | 20.1                 | 0.062 |
| GA at delivery (weeks)      | 31.4                   | 32.4                 | 0.15  |

TTTS: twin-twin transfusion syndrome

FLP: fetoscopic laser photocoagulation

Table S2: TTTS with and without cerclage after FLP

|                             | Without cerclage<br>(N=169) | With cerclage<br>(N=28) | p     |
|-----------------------------|-----------------------------|-------------------------|-------|
| At least fetal survival (N) | 147 (87.0%)                 | 17 (60.7%)              | 0.002 |
| Two survival (N)            | 104 (61.5%)                 | 13 (46.5%)              | 0.149 |
| PROMs after FLP (N))        | 18 (10.7%)                  | 8 (28.6%)               | 0.016 |
| GA at FLP (weeks)           | 20.5                        | 21.4                    | 0.077 |
| GA at delivery (weeks)      | 32.0                        | 28.4                    | 0.007 |

TTTS: twin-twin transfusion syndrome

FLP: fetoscopic laser photocoagulation
